# Supplementary material for: Using Existing Drugs as Leads for Broad Spectrum Anthelmintics Targeting Protein Kinases
Source: PLoS Pathog. 2013 Feb 14;9(2):e1003149. doi: 10.1371/journal.ppat.1003149 (PMC3573124; doi:10.1371/journal.ppat.1003149)
Supplement: Table S7 — Compounds tested in C. elegans , catalog number used, kinase classification of compounds target from drug bank, the phenotype the compound caused in C. elegans , and the EC50 results in C. elegans listed in ppm concentrations. (XLSX) [file ppat.1003149.s016.xlsx]

## Sheet: S7_DrugsTested
Supplemental Table 7. Compounds tested in C. elegans, catalog number used, kinase classfication of compounds target from drug bank, the phenotype the compound caused in C. elegans, and the EC50 results in C. elegans listed in ppm concentrations.
Common Name	DrugBank Number	Catalog Number	Kinase sub	Pheno	EC50 C. elegans (ppm)
Staurosporine	DB02010	BML-EI156	TK_sub2,AGC_sub4,CAMK_sub4		0.335667
5-iodotubercidin	DB04604	BML-EI293	CK1_sub2	Smaller, less developed observed in one testplate	1.00267
K-252a	DB02152	BML-EI152	TK_sub2		7.134
Neomycin (sim to Ribostamycin)	DB03615	BML-EI180	CMGC_sub1	worms poorly developed and bacterial bloom missing from both testplates	8.7805
HA1077	DB04707	BML-EI233	AGC_sub2		10.36
Dasatinib	DB01254	D193600	TK_sub2		10.891
1-Tert-Butyl-3-(4-Chloro-Phenyl)-1h-Pyrazolo[3,4-D]Pyrimidin-4-Ylamine	DB03023	BML-EI297	TK_sub2	Twitching observed in both testplates; tops three doses affected in one testplate	13.9285
2-Methyl-2,4-Pentanediol	DB03684	LTBB003938	TKL_sub4	Jerky Movement	14.59
Benzylphosphonic acid	DB02908	BML-EI244	TK_sub2		16.011
KT-5720 (sim)	DB01933	BML-EI199	AGC_sub4	slowed movment; twitching observed in one testplate	17.8175
1-(5-Tert-Butyl-2-P-Tolyl-2h-Pyrazol-3-Yl)-3-[4-(2-Morpholin-4-Yl-Ethoxy)-Naphthalen-1-Yl]-Urea	DB03044	T6152663	CMGC_sub1	Twitchy	19.148
Flavopiridol	DB03496	F373000	CMGC_sub1	Combination jerky (25%) and no movement (75%)	19.424
RU78191	DB04080	LT00440844	TK_sub2		20
Pentanal	DB01919	LTBB003463	AGC_sub2		>20
Malonic acid	DB02175	LTBB001661	TK_sub2	Jerky and twitchy movement	>20
3-(Benzyloxy)Pyridin-2-Amine	DB02352	LT00012702	CMGC_sub1		>20
4-[3-Methylsulfanylanilino]-6,7-Dimethoxyquinazoline	DB02984	11N-058	CMGC_sub1	Slow movement and twitchy	>20
PASBN	DB03078	LT00076238	TK_sub2		>20
IC261	DB03083	STOCK2S-28164	CK1_sub2		>20
N-(2-Aminoethyl)-5-Chloroisoquinoline-8-Sulfonamide	DB03693	OR0885T	CK1_sub2	Jerky Movement	>20
Celecoxib	DB00482	BML-DL299	AGC_sub4		>20
Imatinib	DB00619	BML-DL271	TK_sub2		>20
Levodopa	DB01235	BML-DL431	CMGC_sub1		>20
Genistein	DB01645	BML-EI147	TK_sub2		>20
2-(4-Morpholinyl)-8-Phenyl-4h-1-Benzopyran-4-One	DB02656	BML-ST420	CAMK_sub4		>20
Resveratrol	DB02709	BML-FR104	CMGC_sub1	Jerky / Abnormal movements	>20
DPI59	DB03217	BML-EI247	TK_sub2		>20
Rbt205 Inhibitor	DB03777	BML-EI246	CAMK_sub4		>20
Phosphonoserine	DB04522	BML-AC695	AGC_sub4,STE_sub1,CAMK_sub4,AGC_sub2		>20
Auranofin	DB00995	LT00440846	TKL_sub4		R
Inhibitor of P38 Kinase	DB01953	STOCK2S-02228	CMGC_sub1		R
SU4984	DB02058	CD01045	TK_sub2		R
Purvalanol A	DB04751	STOCK6S-87487	TK_sub2		R
Etoposide	DB00773	BML-GR307	STE_sub1	Jerky abnormal movements in 1, 2, and 3rd dose observed in one testplate	R
Alpha,Beta-Methyleneadenosine-5'-Triphosphate	DB02596	BML-AC955	AGC_sub4		R
R = Unable to generate EC50
